# Supplementary material for: High pressure polymorphism of LiBH4 and of NaBH4
Source: Royal Society of Chemistry journal article supplement (doi:10.1039/d1ra00816a), 2021-01-01
Supplement: d1ra00816a1.pdf [file d1ra00816a1.pdf]

## Supplementary Information

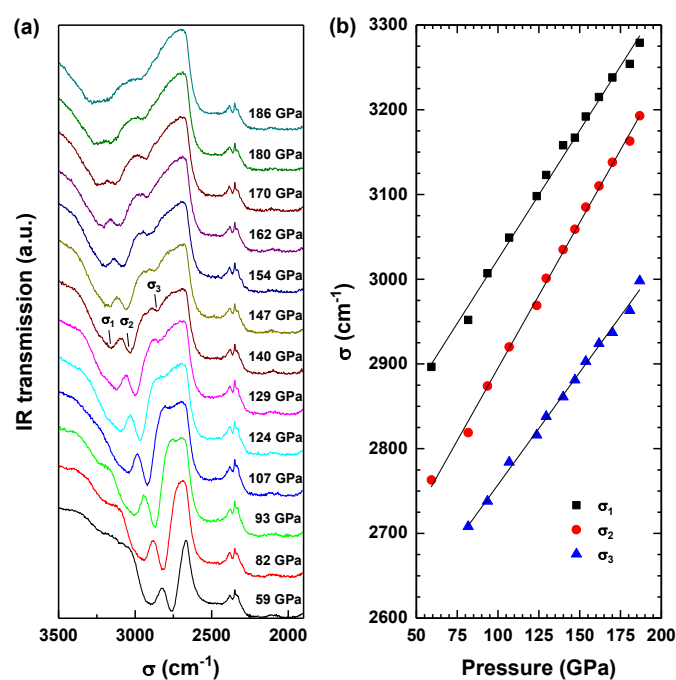

Figure S1 : a) IR transmission spectra of NaBH<sub>4</sub> at selected pressures and 300 K zoomed on regions of interest. (b) Evolution of the corresponding pressures of the three absorption bands related to B-H stretching vibrations

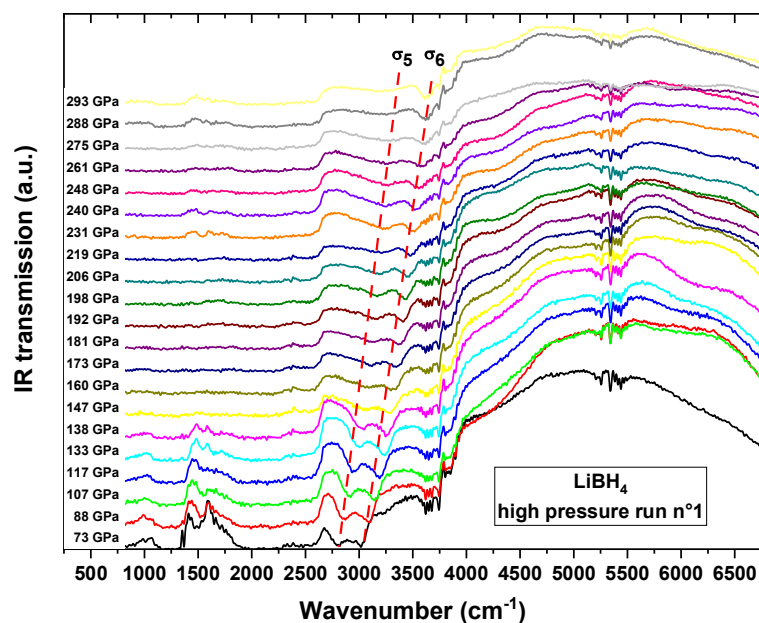

Figure S2 : IR transmission spectra of LiBH<sub>4</sub> for the high pressure run n°1 at 300 K. Followed absorption bands are indicated by red lines.

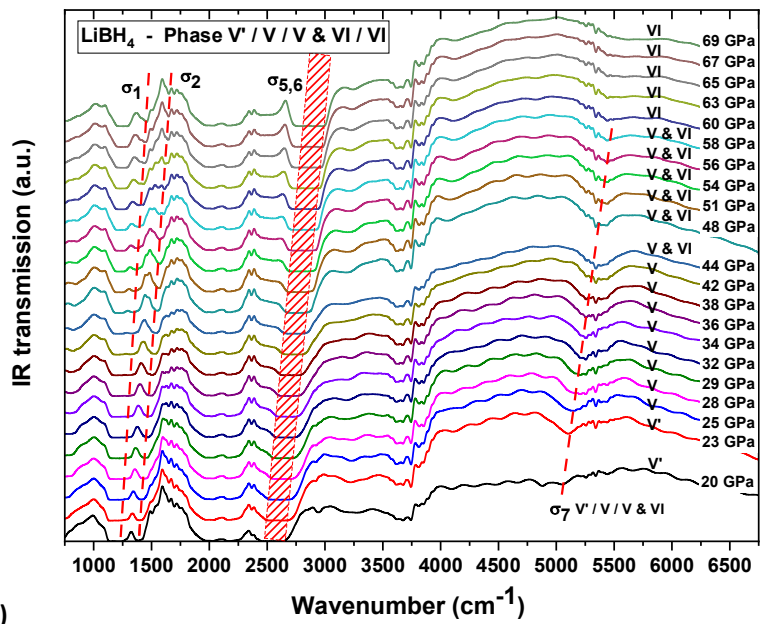

a)

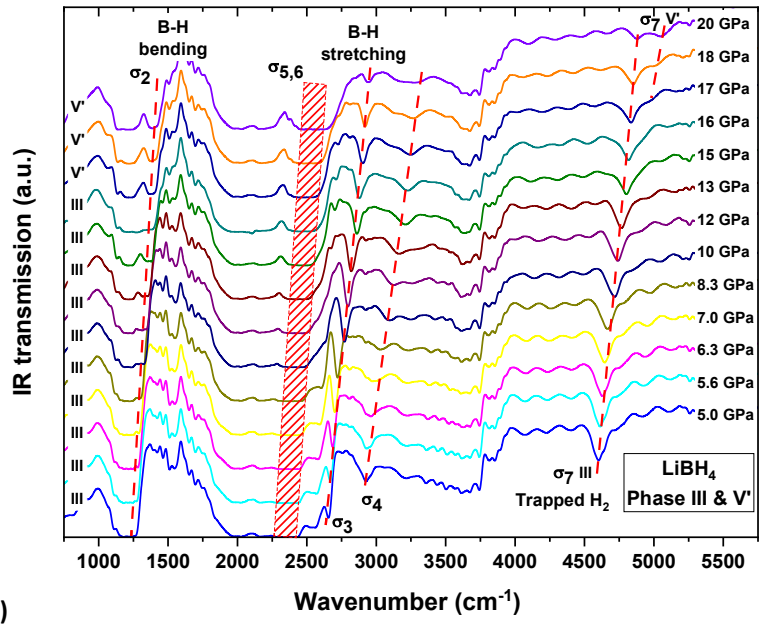

b)

Figure S3 : IR transmission spectra of  $\text{LiBH}_4$  at selected pressures and 300 K from (a) 20 to 69 GPa and from (b) 5 to 20 GPa (same diamond anvil cell). Followed absorption bands are indicated by red lines. Red rectangles indicate the saturated main stretching bands of  $\text{LiBH}_4$ .

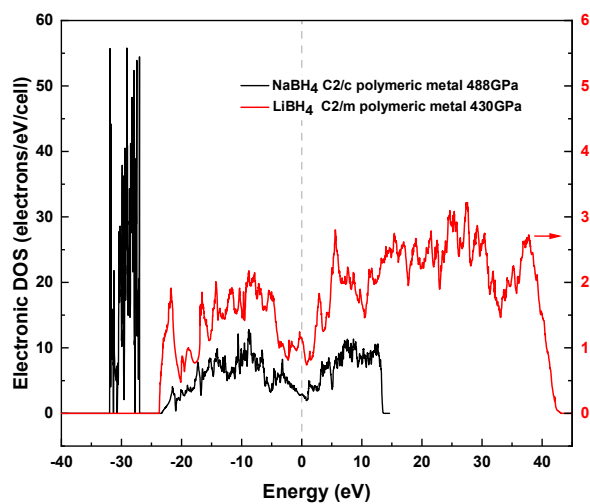

Figure S4 : Electronic density of states of metallic  $C2/m$  polymeric  $LiBH_4$  at 430 GPa and of  $C2/c$  polymeric  $NaBH_4$  at 488 GPa. The Fermi level is set at 0 eV.

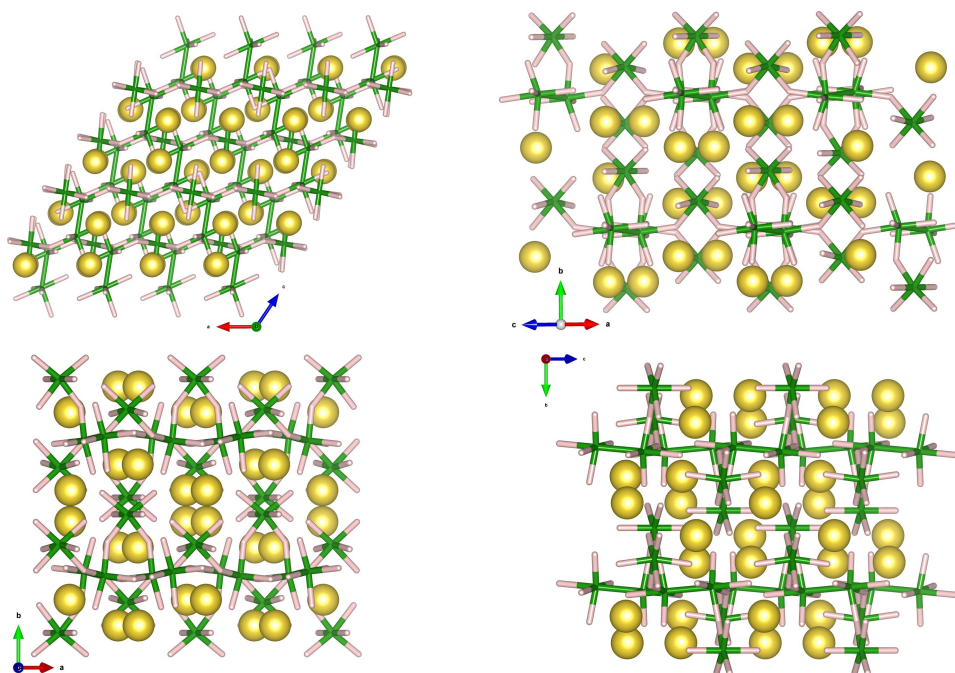

Figure S5 : Extended views of the predicted  $C2/c$  polymeric metallic  $NaBH_4$  showing the layered feature.

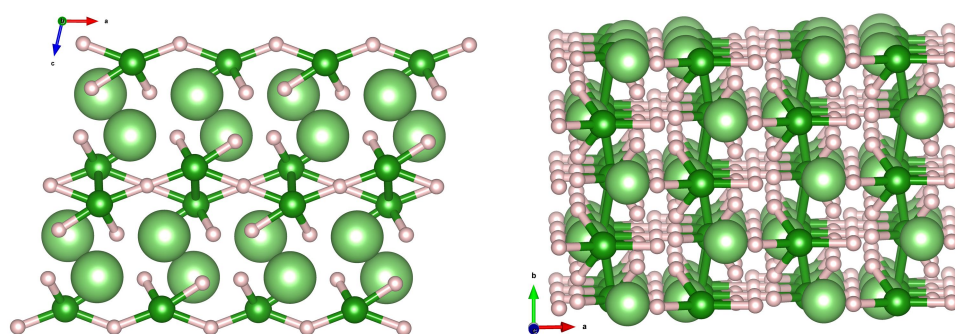

Figure S6 : Extended views of the  $C2/m$  polymeric metallic  $LiBH_4$  predicted by Yao & Klug [1]

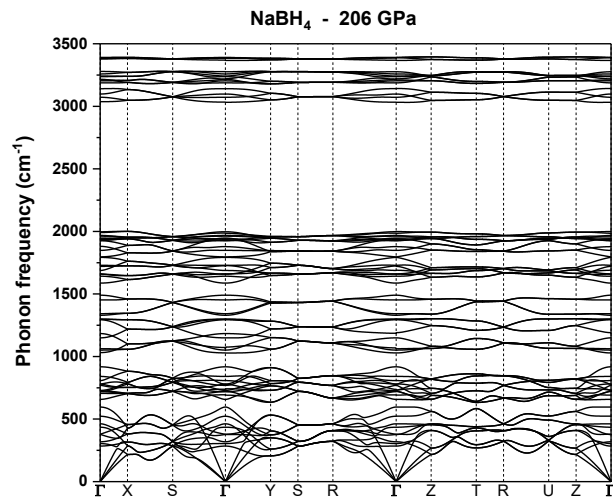

Figure S7 : Phonon band structure of *Pnma* NaBH<sub>4</sub> at 206 GPa.

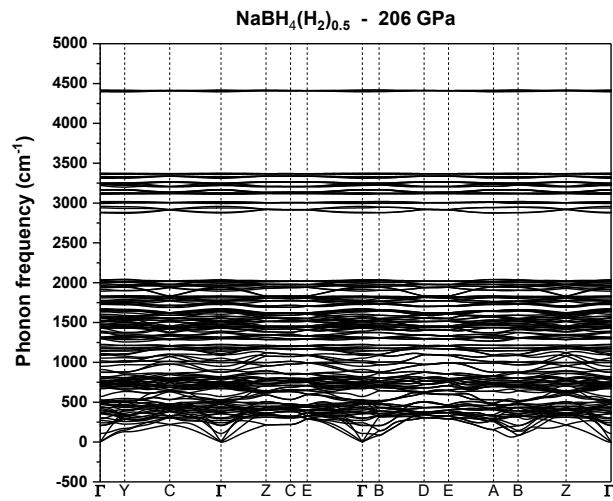

Figure S8 : Phonon band structure of the predicted NaBH<sub>4</sub>(H<sub>2</sub>)<sub>0.5</sub> at 206 GPa.

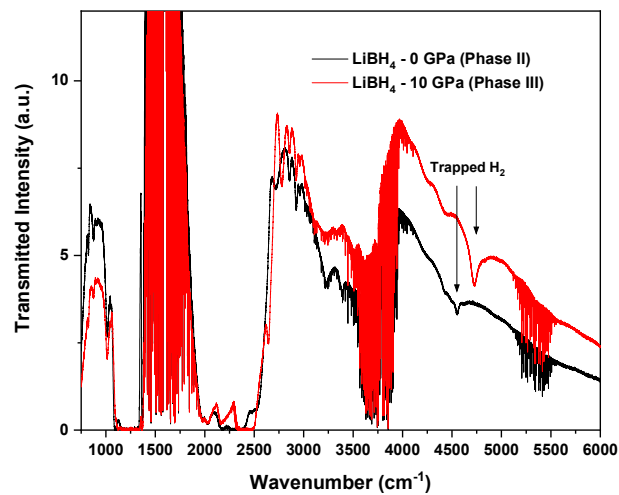

Figure S9 : IR transmission spectra of LiBH<sub>4</sub> before and after the phase transition II/III.

All CIF below were generated by FINDSYM [2] from the ABINIT code output. Unique axis *b* was taken for monoclinic cell. Cell lengths are given in ångström.

### **CIF file of phase II $P4_2/nmc$ $\text{NaBH}_4$ computed at 5.9 GPa**

# CIF file created by FINDSYM, version 7.0

data\_NaBH4 / Phase II / 5.9 GPa / DFT  
\_audit\_creation\_method FINDSYM

\_cell\_length\_a 4.06814  
\_cell\_length\_b 4.06814  
\_cell\_length\_c 5.55754  
\_cell\_angle\_alpha 90.0000  
\_cell\_angle\_beta 90.0000  
\_cell\_angle\_gamma 90.0000  
\_cell\_volume 91.9761

\_symmetry\_space\_group\_name\_H-M "P 42/n 21/m 2/c (origin choice 2)"  
\_symmetry\_Int\_Tables\_number 137  
\_space\_group.reference\_setting '137:-P 4ac 2a'  
\_space\_group.transform\_Pp\_abc a,b,c;0,0,0

loop\_  
\_space\_group\_symop\_id  
\_space\_group\_symop\_operation\_xyz  
1 x,y,z  
2 x+1/2,-y,-z  
3 -x,y+1/2,-z  
4 -x+1/2,-y+1/2,z  
5 -y,-x,-z+1/2  
6 -y+1/2,x,z+1/2  
7 y,-x+1/2,z+1/2  
8 y+1/2,x+1/2,-z+1/2  
9 -x,-y,-z  
10 -x+1/2,y,z  
11 x,-y+1/2,z  
12 x+1/2,y+1/2,-z  
13 y,x,z+1/2  
14 y+1/2,-x,-z+1/2  
15 -y,x+1/2,-z+1/2  
16 -y+1/2,-x+1/2,z+1/2

loop\_  
\_atom\_site\_label  
\_atom\_site\_type\_symbol  
\_atom\_site\_symmetry\_multiplicity  
\_atom\_site\_Wyckoff\_label  
\_atom\_site\_fract\_x  
\_atom\_site\_fract\_y  
\_atom\_site\_fract\_z  
\_atom\_site\_occupancy  
\_atom\_site\_fract\_symmform

```
Na1 Na 2 a 0.75000 0.25000 0.75000 1.00000 0,0,0
B1 B 2 b 0.75000 0.25000 0.25000 1.00000 0,0,0
H1 H 8 g 0.25000 0.50530 0.62484 1.00000 0,Dy,Dz
```

# end of cif

### **CIF file of $P\text{-}42_1c$ $\text{NaBH}_4$ computed at 5.9 GPa (not stable)**

# CIF file created by FINDSYM, version 7.0

data\_NaBH4 / P-421c / 5.9 GPa / DFT  
\_audit\_creation\_method FINDSYM

\_cell\_length\_a 4.06814  
\_cell\_length\_b 4.06814  
\_cell\_length\_c 5.55754  
\_cell\_angle\_alpha 90.0000  
\_cell\_angle\_beta 90.0000  
\_cell\_angle\_gamma 90.0000  
\_cell\_volume 91.9761

\_symmetry\_space\_group\_name\_H-M "P -4 21 c"  
\_symmetry\_Int\_Tables\_number 114  
\_space\_group.reference\_setting '114:P -4 2n'  
\_space\_group.transform\_Pp\_abc a,b,c;0,0,0

loop\_  
\_space\_group\_symop\_id  
\_space\_group\_symop\_operation\_xyz  
1 x,y,z  
2 x+1/2,-y+1/2,-z+1/2  
3 -x+1/2,y+1/2,-z+1/2  
4 -x,-y,z  
5 y+1/2,x+1/2,z+1/2  
6 y,-x,-z  
7 -y,x,-z  
8 -y+1/2,-x+1/2,z+1/2

loop\_  
\_atom\_site\_label  
\_atom\_site\_type\_symbol  
\_atom\_site\_symmetry\_multiplicity  
\_atom\_site\_Wyckoff\_label  
\_atom\_site\_fract\_x  
\_atom\_site\_fract\_y  
\_atom\_site\_fract\_z  
\_atom\_site\_occupancy  
\_atom\_site\_fract\_symmform  
Na1 Na 2 b 0.00000 0.00000 0.50000 1.00000 0,0,0  
B1 B 2 a 0.00000 0.00000 0.00000 1.00000 0,0,0  
H1 H 8 e 0.00014 0.75530 0.87484 1.00000 Dx,Dy,Dz

# end of cif

### **CIF file of phase III *Pnma* NaBH<sub>4</sub> computed at 206 GPa**

# CIF file created by FINDSYM, version 5.1.0

data\_NaBH4 / Phase III / 206 GPa / DFT

\_audit\_creation\_method FINDSYM

\_cell\_length\_a 5.40605

\_cell\_length\_b 3.27954

\_cell\_length\_c 4.23353

\_cell\_angle\_alpha 90.0000

\_cell\_angle\_beta 90.0000

\_cell\_angle\_gamma 90.0000

\_symmetry\_space\_group\_name\_H-M "P 21/n 21/m 21/a"

\_symmetry\_Int\_Tables\_number 62

\_space\_group.reference\_setting '062:-P 2ac 2n'

\_space\_group.transform\_Pp\_abc a,b,c;0,0,0

loop\_

\_space\_group\_symop\_id

\_space\_group\_symop\_operation\_xyz

1 x,y,z

2 x+1/2,-y+1/2,-z+1/2

3 -x,y+1/2,-z

4 -x+1/2,-y,z+1/2

5 -x,-y,-z

6 -x+1/2,y+1/2,z+1/2

7 x,-y+1/2,z

8 x+1/2,y,-z+1/2

loop\_

\_atom\_site\_label

\_atom\_site\_type\_symbol

\_atom\_site\_symmetry\_multiplicity

\_atom\_site\_Wyckoff\_label

\_atom\_site\_fract\_x

\_atom\_site\_fract\_y

\_atom\_site\_fract\_z

\_atom\_site\_occupancy

Na1 Na 4 c 0.83379 0.25000 0.79722 1.00000

B1 B 4 c 0.41871 0.25000 0.19985 1.00000

H1 H 4 c 0.58850 0.25000 0.05307 1.00000

H2 H 4 c 0.23820 0.25000 0.07472 1.00000

H3 H 8 d 0.40806 0.51046 0.36350 1.00000

# end of cif

## CIF file of $P2_1/c$ NaBH<sub>4</sub>(H<sub>2</sub>)<sub>0.5</sub> computed at 206 GPa

```
# CIF file created by FINDSYM, version 5.1.0

data_NaBH4(H2)0.5 / 206 GPa / DFT
_audit_creation_method FINDSYM

_cell_length_a      5.93287
_cell_length_b      3.18380
_cell_length_c      8.72013
_cell_angle_alpha   90.0000
_cell_angle_beta    99.3611
_cell_angle_gamma   90.0000

_symmetry_space_group_name_H-M "P 1 21/c 1"
_symmetry_Int_Tables_number 14
_space_group.reference_setting '014:-P 2ybc'
_space_group.transform_Pp_abc a,b,c;0,0,0

loop_
_space_group_symop_id
_space_group_symop_operation_xyz
1 x,y,z
2 -x,y+1/2,-z+1/2
3 -x,-y,-z
4 x,-y+1/2,z+1/2

loop_
_atom_site_label
_atom_site_type_symbol
_atom_site_symmetry_multiplicity
_atom_site_Wyckoff_label
_atom_site_fract_x
_atom_site_fract_y
_atom_site_fract_z
_atom_site_occupancy
Na1 Na 4 e 0.87115 0.74995 0.87377 1.00000
Na2 Na 4 e 0.35775 0.74993 0.88396 1.00000
B1 B 4 e 0.36748 0.75008 0.14151 1.00000
B2 B 4 e -0.09160 0.75003 0.13689 1.00000
H1 H 4 e 0.62153 0.53508 0.78458 1.00000
H2 H 4 e 0.37846 0.46476 0.71542 1.00000
H3 H 4 e 0.74777 0.75008 0.18624 1.00000
H4 H 4 e 0.10841 -0.01877 -0.05640 1.00000
H5 H 4 e 0.89157 0.01874 0.55641 1.00000
H6 H 4 e 0.52234 0.75011 0.08778 1.00000
H7 H 4 e 0.20532 0.75006 0.05601 1.00000
H8 H 4 e 0.07049 0.74996 0.72626 1.00000
H9 H 4 e 0.35122 0.13628 0.02985 1.00000
H10 H 4 e 0.64873 0.86395 0.47003 1.00000

# end of cif
```



## CIF file of metallic C2/c NaBH<sub>4</sub> computed at 488 GPa

```
# CIF file created by FINDSYM, version 7.0

data_NaBH4 / C2/c metal / 488 GPa / DFT
_audit_creation_method FINDSYM

_cell_length_a    5.42036
_cell_length_b    8.88260
_cell_length_c    5.33356
_cell_angle_alpha 90.0000
_cell_angle_beta  124.09675
_cell_angle_gamma 90.0000
_cell_volume      212.6499

_symmetry_space_group_name_H-M "C 1 2/c 1"
_symmetry_Int_Tables_number 15
_space_group.reference_setting '015:-C 2yc'
_space_group.transform_Pp_abc a,b,c;0,0,0

loop_
_space_group_symop_id
_space_group_symop_operation_xyz
1 x,y,z
2 -x,y,-z+1/2
3 -x,-y,-z
4 x,-y,z+1/2
5 x+1/2,y+1/2,z
6 -x+1/2,y+1/2,-z+1/2
7 -x+1/2,-y+1/2,-z
8 x+1/2,-y+1/2,z+1/2

loop_
_atom_site_label
_atom_site_type_symbol
_atom_site_symmetry_multiplicity
_atom_site_Wyckoff_label
_atom_site_fract_x
_atom_site_fract_y
_atom_site_fract_z
_atom_site_occupancy
_atom_site_fract_symmform
Na1 Na 8 f 0.07010 0.15344 -0.04719 1.00000 Dx,Dy,Dz
Na2 Na 8 f 0.42387 0.05835 0.55562 1.00000 Dx,Dy,Dz
B1 B 8 f 0.32172 0.24221 0.66953 1.00000 Dx,Dy,Dz
B2 B 4 e 0.00000 0.64194 0.25000 1.00000 0,Dy,0
B3 B 4 e 0.00000 0.03097 0.25000 1.00000 0,Dy,0
H1 H 8 f 0.54299 0.22947 -0.06354 1.00000 Dx,Dy,Dz
H2 H 8 f 0.37632 0.15978 -0.00443 1.00000 Dx,Dy,Dz
H3 H 8 f 0.81065 0.04801 0.70291 1.00000 Dx,Dy,Dz
H4 H 8 f 0.60541 0.46894 -0.00166 1.00000 Dx,Dy,Dz
H5 H 8 f 0.34767 0.36720 0.71850 1.00000 Dx,Dy,Dz
H6 H 8 f 0.17495 0.26220 0.77630 1.00000 Dx,Dy,Dz
H7 H 8 f 0.25898 0.12652 0.67897 1.00000 Dx,Dy,Dz
```

H8 H 8 f 0.17699 0.44101 0.78805 1.00000 Dx,Dy,Dz

# end of cif

### **CIF file of phase II *Pnma* LiBH<sub>4</sub> computed at 0 GPa**

# CIF file created by FINDSYM, version 7.0

data\_LiBH4 / Phase II / 0 GPa / DFT  
\_audit\_creation\_method FINDSYM

\_cell\_length\_a 7.51975  
\_cell\_length\_b 4.39311  
\_cell\_length\_c 6.49990  
\_cell\_angle\_alpha 90.0000  
\_cell\_angle\_beta 90.0000  
\_cell\_angle\_gamma 90.0000  
\_cell\_volume 214.7249

\_symmetry\_space\_group\_name\_H-M "P 21/n 21/m 21/a"  
\_symmetry\_Int\_Tables\_number 62  
\_space\_group.reference\_setting '062:-P 2ac 2n'  
\_space\_group.transform\_Pp\_abc a,b,c;0,0,0

loop\_  
\_space\_group\_symop\_id  
\_space\_group\_symop\_operation\_xyz  
1 x,y,z  
2 x+1/2,-y+1/2,-z+1/2  
3 -x,y+1/2,-z  
4 -x+1/2,-y,z+1/2  
5 -x,-y,-z  
6 -x+1/2,y+1/2,z+1/2  
7 x,-y+1/2,z  
8 x+1/2,y,-z+1/2

loop\_  
\_atom\_site\_label  
\_atom\_site\_type\_symbol  
\_atom\_site\_symmetry\_multiplicity  
\_atom\_site\_Wyckoff\_label  
\_atom\_site\_fract\_x  
\_atom\_site\_fract\_y  
\_atom\_site\_fract\_z  
\_atom\_site\_occupancy  
\_atom\_site\_fract\_symmform  
Li1 Li 4 c 0.15395 0.25000 0.11109 1.00000 Dx,0,Dz  
B1 B 4 c 0.32124 0.25000 0.41342 1.00000 Dx,0,Dz  
H1 H 4 c -0.08729 0.25000 -0.06920 1.00000 Dx,0,Dz  
H2 H 4 c 0.41379 0.25000 0.25768 1.00000 Dx,0,Dz  
H3 H 8 d 0.22451 0.02548 0.41010 1.00000 Dx,Dy,Dz

# end of cif

### **CIF file of phase III $I4_1/acd$ $\text{LiBH}_4$ computed at 11.8 GPa**

# CIF file created by FINDSYM, version 7.0

data\_LiBH4 / Phase III / 11.8 GPa / DFT  
\_audit\_creation\_method FINDSYM

\_cell\_length\_a 6.86259  
\_cell\_length\_b 6.86259  
\_cell\_length\_c 11.9289  
\_cell\_angle\_alpha 90.0000  
\_cell\_angle\_beta 90.0000  
\_cell\_angle\_gamma 90.0000  
\_cell\_volume 561.7951

\_symmetry\_space\_group\_name\_H-M "I 41/a 2/c 2/d (origin choice 2)"  
\_symmetry\_Int\_Tables\_number 142  
\_space\_group.reference\_setting '142:-I 4bd 2c'  
\_space\_group.transform\_Pp\_abc a,b,c;0,0,0

loop\_  
\_space\_group\_symop\_id  
\_space\_group\_symop\_operation\_xyz  
1 x,y,z  
2 x+1/2,-y+1/2,-z  
3 -x+1/2,y,-z  
4 -x,-y+1/2,z  
5 -y+1/4,-x+1/4,-z+1/4  
6 -y+1/4,x+3/4,z+1/4  
7 y+3/4,-x+3/4,z+1/4  
8 y+3/4,x+1/4,-z+1/4  
9 -x,-y,-z  
10 -x,y,z+1/2  
11 x,-y+1/2,z+1/2  
12 x,y+1/2,-z  
13 y+1/4,x+1/4,z+1/4  
14 y+3/4,-x+1/4,-z+3/4  
15 -y+1/4,x+1/4,-z+3/4  
16 -y+3/4,-x+1/4,z+1/4  
17 x+1/2,y+1/2,z+1/2  
18 x,-y,-z+1/2  
19 -x,y+1/2,-z+1/2  
20 -x+1/2,-y,z+1/2  
21 -y+3/4,-x+3/4,-z+3/4  
22 -y+3/4,x+1/4,z+3/4  
23 y+1/4,-x+1/4,z+3/4  
24 y+1/4,x+3/4,-z+3/4  
25 -x+1/2,-y+1/2,-z+1/2  
26 -x+1/2,y+1/2,z  
27 x+1/2,-y,z

```

28 x+1/2,y,-z+1/2
29 y+3/4,x+3/4,z+3/4
30 y+1/4,-x+3/4,-z+1/4
31 -y+3/4,x+3/4,-z+1/4
32 -y+1/4,-x+3/4,z+3/4

loop_
_atom_site_label
_atom_site_type_symbol
_atom_site_symmetry_multiplicity
_atom_site_Wyckoff_label
_atom_site_fract_x
_atom_site_fract_y
_atom_site_fract_z
_atom_site_occupancy
_atom_site_fract_symmform
Li1 Li 8 a 0.00000 0.25000 0.37500 1.00000 0,0,0
Li2 Li 8 b 0.00000 0.25000 0.12500 1.00000 0,0,0
B1 B 16 e 0.45841 0.00000 0.25000 1.00000 Dx,0,0
H1 H 32 g 0.60941 0.60223 0.00221 1.00000 Dx,Dy,Dz
H2 H 32 g 0.24744 0.31580 0.41943 1.00000 Dx,Dy,Dz

# end of cif

```

### **CIF file of phase VI *Pnma* LiBH<sub>4</sub> computed at 100 GPa**

```

# CIF file created by FINDSYM, version 7.0

data_LiBH4 / Phase VI / 100 GPa / DFT
_audit_creation_method FINDSYM

_cell_length_a      5.41509
_cell_length_b      3.30702
_cell_length_c      4.39608
_cell_angle_alpha   90.0000
_cell_angle_beta    90.0000
_cell_angle_gamma   90.0000
_cell_volume        78.7243

_symmetry_space_group_name_H-M "P 21/n 21/m 21/a"
_symmetry_Int_Tables_number 62
_space_group.reference_setting '062:-P 2ac 2n'
_space_group.transform_Pp_abc a,b,c;0,0,0

loop_
_space_group_symop_id
_space_group_symop_operation_xyz
1 x,y,z
2 x+1/2,-y+1/2,-z+1/2
3 -x,y+1/2,-z
4 -x+1/2,-y,z+1/2
5 -x,-y,-z

```

6 -x+1/2,y+1/2,z+1/2  
7 x,-y+1/2,z  
8 x+1/2,y,-z+1/2

loop\_

\_atom\_site\_label

\_atom\_site\_type\_symbol

\_atom\_site\_symmetry\_multiplicity

\_atom\_site\_Wyckoff\_label

\_atom\_site\_fract\_x

\_atom\_site\_fract\_y

\_atom\_site\_fract\_z

\_atom\_site\_occupancy

\_atom\_site\_fract\_symmform

|     |    |     |         |         |         |         |          |
|-----|----|-----|---------|---------|---------|---------|----------|
| Li1 | Li | 4 c | 0.83205 | 0.25000 | 0.29948 | 1.00000 | Dx,0,Dz  |
| B1  | B  | 4 c | 0.42347 | 0.25000 | 0.69623 | 1.00000 | Dx,0,Dz  |
| H1  | H  | 8 d | 0.59058 | 0.47770 | 0.14367 | 1.00000 | Dx,Dy,Dz |
| H2  | H  | 4 c | 0.60419 | 0.25000 | 0.56626 | 1.00000 | Dx,0,Dz  |
| H3  | H  | 4 c | 0.24995 | 0.25000 | 0.55012 | 1.00000 | Dx,0,Dz  |

# end of cif

### **CIF file of C2/c LiBH<sub>4</sub> computed at 300 GPa**

# CIF file created by FINDSYM, version 7.0

data\_LiBH4 / C2/c Yao & Klug / 300 GPa / DFT

\_audit\_creation\_method FINDSYM

\_cell\_length\_a 5.47834

\_cell\_length\_b 8.81957

\_cell\_length\_c 5.21970

\_cell\_angle\_alpha 90.0000

\_cell\_angle\_beta 122.0053

\_cell\_angle\_gamma 90.0000

\_cell\_volume 213.8642

\_symmetry\_space\_group\_name\_H-M "C 1 2/c 1"

\_symmetry\_Int\_Tables\_number 15

\_space\_group.reference\_setting '015:-C 2yc'

\_space\_group.transform\_Pp\_abc a,b,c;0,0,0

loop\_

\_space\_group\_symop\_id

\_space\_group\_symop\_operation\_xyz

1 x,y,z

2 -x,y,-z+1/2

3 -x,-y,-z

4 x,-y,z+1/2

5 x+1/2,y+1/2,z

6 -x+1/2,y+1/2,-z+1/2

7 -x+1/2,-y+1/2,-z

8 x+1/2,-y+1/2,z+1/2

loop\_

\_atom\_site\_label

\_atom\_site\_type\_symbol

\_atom\_site\_symmetry\_multiplicity

\_atom\_site\_Wyckoff\_label

\_atom\_site\_fract\_x

\_atom\_site\_fract\_y

\_atom\_site\_fract\_z

\_atom\_site\_occupancy

\_atom\_site\_fract\_symmform

|     |    |     |         |         |          |         |          |
|-----|----|-----|---------|---------|----------|---------|----------|
| Li1 | Li | 8 f | 0.12717 | 0.12453 | 0.00830  | 1.00000 | Dx,Dy,Dz |
| Li2 | Li | 8 f | 0.36886 | 0.08577 | 0.50117  | 1.00000 | Dx,Dy,Dz |
| B1  | B  | 8 f | 0.22850 | 0.23018 | 0.69902  | 1.00000 | Dx,Dy,Dz |
| B2  | B  | 4 e | 0.00000 | 0.57310 | 0.25000  | 1.00000 | 0,Dy,0   |
| B3  | B  | 4 e | 0.00000 | 0.02316 | 0.25000  | 1.00000 | 0,Dy,0   |
| H1  | H  | 8 f | 0.53937 | 0.25598 | -0.02886 | 1.00000 | Dx,Dy,Dz |
| H2  | H  | 8 f | 0.39898 | 0.12924 | 0.03071  | 1.00000 | Dx,Dy,Dz |
| H3  | H  | 8 f | 0.84327 | 0.06176 | 0.72913  | 1.00000 | Dx,Dy,Dz |
| H4  | H  | 8 f | 0.60236 | 0.43079 | -0.01836 | 1.00000 | Dx,Dy,Dz |
| H5  | H  | 8 f | 0.36061 | 0.33003 | 0.71974  | 1.00000 | Dx,Dy,Dz |
| H6  | H  | 8 f | 0.15465 | 0.24366 | 0.85411  | 1.00000 | Dx,Dy,Dz |
| H7  | H  | 8 f | 0.37342 | 0.13747 | 0.74487  | 1.00000 | Dx,Dy,Dz |
| H8  | H  | 8 f | 0.16665 | 0.49818 | 0.75860  | 1.00000 | Dx,Dy,Dz |

# end of cif

### **CIF file of metallic C2/m LiBH<sub>4</sub> computed at 488 GPa**

# CIF file created by FINDSYM, version 7.0

data\_LiBH4 / C2/m metallic Yao & Klug / 488 GPa / DFT

\_audit\_creation\_method FINDSYM

\_cell\_length\_a 4.58861

\_cell\_length\_b 2.77723

\_cell\_length\_c 3.46473

\_cell\_angle\_alpha 90.0000

\_cell\_angle\_beta 102.8044

\_cell\_angle\_gamma 90.0000

\_cell\_volume 43.0554

\_symmetry\_space\_group\_name\_H-M "C 1 2/m 1"

\_symmetry\_Int\_Tables\_number 12

\_space\_group.reference\_setting '012:-C 2y'

\_space\_group.transform\_Pp\_abc a,b,c;0,0,0

loop\_

\_space\_group\_symop\_id

\_space\_group\_symop\_operation\_xyz

1 x,y,z

2 -x,y,-z  
3 -x,-y,-z  
4 x,-y,z  
5 x+1/2,y+1/2,z  
6 -x+1/2,y+1/2,-z  
7 -x+1/2,-y+1/2,-z  
8 x+1/2,-y+1/2,z

loop\_

\_atom\_site\_label

\_atom\_site\_type\_symbol

\_atom\_site\_symmetry\_multiplicity

\_atom\_site\_Wyckoff\_label

\_atom\_site\_fract\_x

\_atom\_site\_fract\_y

\_atom\_site\_fract\_z

\_atom\_site\_occupancy

\_atom\_site\_fract\_symmform

|     |    |     |         |         |         |         |          |
|-----|----|-----|---------|---------|---------|---------|----------|
| Li1 | Li | 4 l | 0.64950 | 0.00000 | 0.35546 | 1.00000 | Dx,0,Dz  |
| B1  | B  | 4 i | 0.27549 | 0.00000 | 0.12878 | 1.00000 | Dx,0,Dz  |
| H1  | H  | 2 a | 0.00000 | 0.00000 | 0.00000 | 1.00000 | 0,0,0    |
| H2  | H  | 2 b | 0.00000 | 0.50000 | 0.00000 | 1.00000 | 0,0,0    |
| H3  | H  | 4 i | 0.09681 | 0.00000 | 0.31428 | 1.00000 | Dx,0,Dz  |
| H4  | H  | 8 j | 0.40128 | 0.28125 | 0.34126 | 1.00000 | Dx,Dy,Dz |

# end of cif

---

## **References**

- [1] Y. Yao and D. D. Klug, "High-pressure phases of lithium borohydride LiBH<sub>4</sub>: A first-principles study," *Phys. Rev. B*, vol. 86, no. 6, p. 064107, Aug. 2012.
- [2] H. T. Stokes and D. M. Hatch, "FINDSYM : program for identifying the space-group symmetry of a crystal," *J. Appl. Crystallogr.*, vol. 38, no. 1, pp. 237–238, Feb. 2005.
